# Supplementary material for: Ultrathin layered MoS2 nanosheets with rich active sites for enhanced visible light photocatalytic activity
Source: Royal Society of Chemistry journal article supplement (doi:10.1039/c8ra02560f), 2018-01-01
Supplement: c8ra02560f1.pdf [file c8ra02560f1.pdf]

**Ultrathin layered MoS<sub>2</sub> nanosheets with rich active sites for enhanced visible light photocatalytic activity**

**R. Abinaya<sup>1,4</sup>, J. Archana<sup>1,2\*</sup>, S. Harish<sup>3</sup>, M. Navaneethan<sup>1,2\*</sup>,**

**S. Ponnusamy<sup>1</sup>, C. Muthamizhchelvan<sup>1</sup>, M. Shimomura<sup>4</sup>, Y. Hayakawa<sup>3,4</sup>**

<sup>1</sup>Center for Material Science and Nanodevices, Department of Physics and Nanotechnology, SRM Institute of Science and Technology, Kattankulathur-603 203, Tamil Nadu, India

<sup>2</sup>SRM Research Institute, SRM Institute of Science and Technology, Kattankulathur, Chennai 603203, Tamil Nadu, India.

<sup>3</sup>Research Institute of Electronics, Shizuoka University

3-5-1 Johoku, Naka-Ku, Hamamatsu, Shizuoka 432-8011, Japan.

<sup>4</sup>Graduate School of Science and Technology, Shizuoka University

3-5-1 Johoku, Naka-Ku, Hamamatsu, Shizuoka 432-8011, Japan.

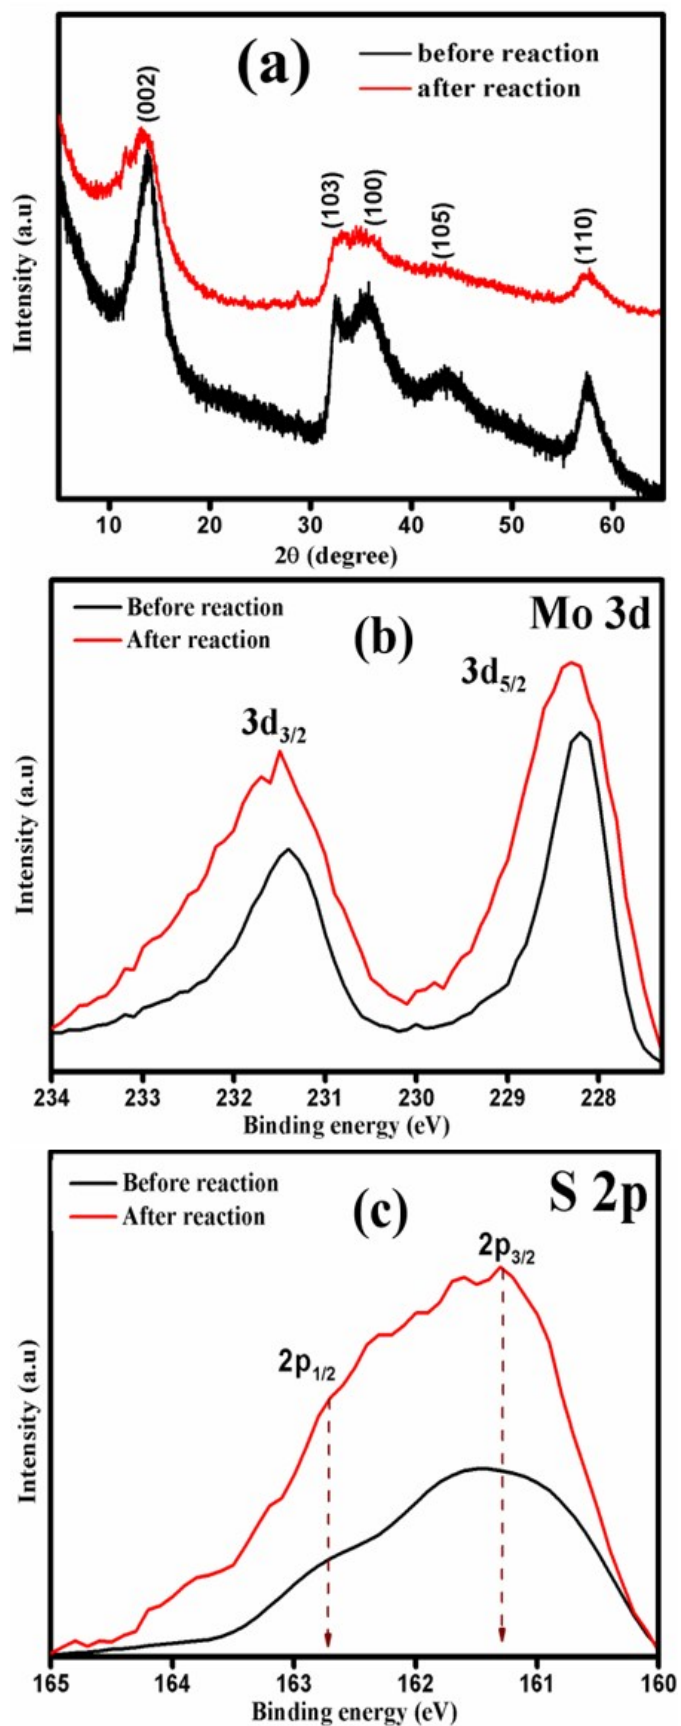

ES1 (a) XRD pattern of the sample S1 before and after the photocatalytic reaction (b) XPS spectra of sample S1 before and after degradation reaction.

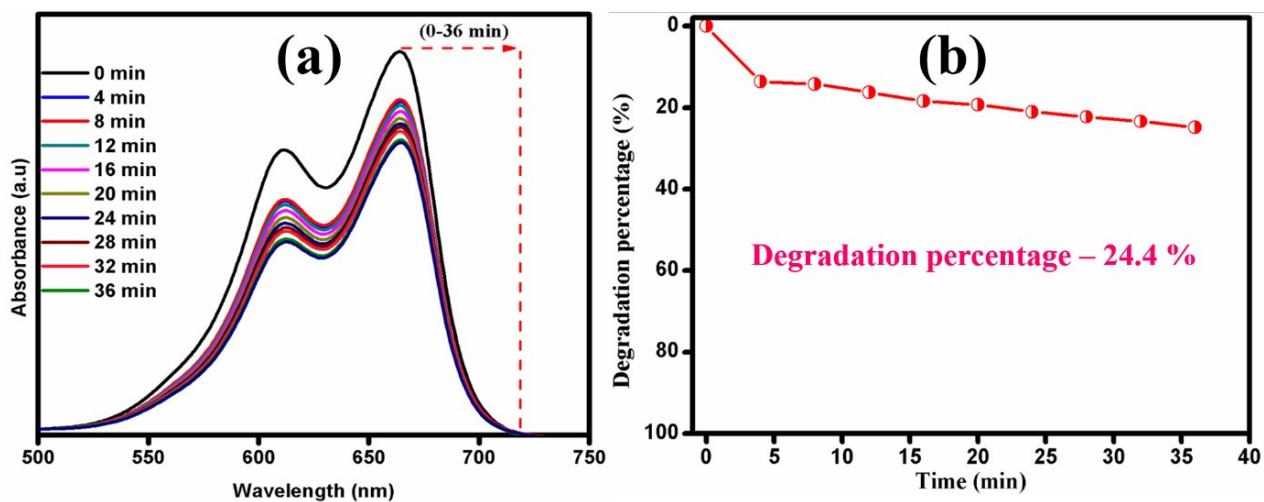

ES2. (a) Time dependent of UV-Vis absorbance spectra of MB degradation of catalyst  $\text{TiO}_2$ , (b) Maximum degradation percentage of MB of  $\text{TiO}_2$  catalyst.
